# Supplementary material for: Study of the Electrochemical Behavior of N-Substituted-4-Piperidones Curcumin Analogs: A Combined Experimental and Theoretical Approach
Source: MDPI journal article supplement (doi:10.3390/ijms232315043), 2022-11-30
Supplement: s1 [file s1]

## Supplementary Material

# Study of the Electrochemical Behavior of N-Substituted-4-Piperidones Curcumin Analogs: A Combined Experimental and Theoretical Approach

John Amalraj<sup>1</sup>, Claudia E. Vergara<sup>2</sup>, Matías Monroy-Cárdenas<sup>1,3</sup>, Ramiro Araya-Maturana<sup>1,3\*</sup> and Maximiliano Martínez-Cifuentes<sup>4\*</sup>

<sup>1</sup> Instituto de Química de Recursos Naturales, Universidad de Talca, Talca 3460000, Chile

<sup>2</sup> Departamento de Ciencias Básicas, Facultad de Ciencias, Universidad Santo Tomás, Avda. Carlos Schorr 255, Talca, Chile

<sup>3</sup> MIBI: Interdisciplinary Group on Mitochondrial Targeting and Bioenergetics, Universidad de Talca, P.O. Box 747, Talca 3460000, Chile

<sup>4</sup> Departamento de Química Orgánica, Facultad de Ciencias Químicas, Universidad de Concepción, Edmundo Larenas 129, Concepción P.C. 4070371, Chile

\* Correspondence: raraya@utalca.cl (R.A.-M.); maxmartinez@udec.cl (M.M.-C.)

### Content

- Table S1. Optimized geometries for triplet dications of all compounds at DFT M06/6-311+G(d,p) level
- Table S2. Optimized geometries for singlet dications of all compounds at DFT M06/6-311+G(d,p) level
- Optimized geometry cartesian coordinates of all compounds (neutral, singlet dication and triplet dication)

**Table S1.** Optimized geometries for triplet dications of compounds 1 -10 at DFT M06/6-311+G(d,p) level

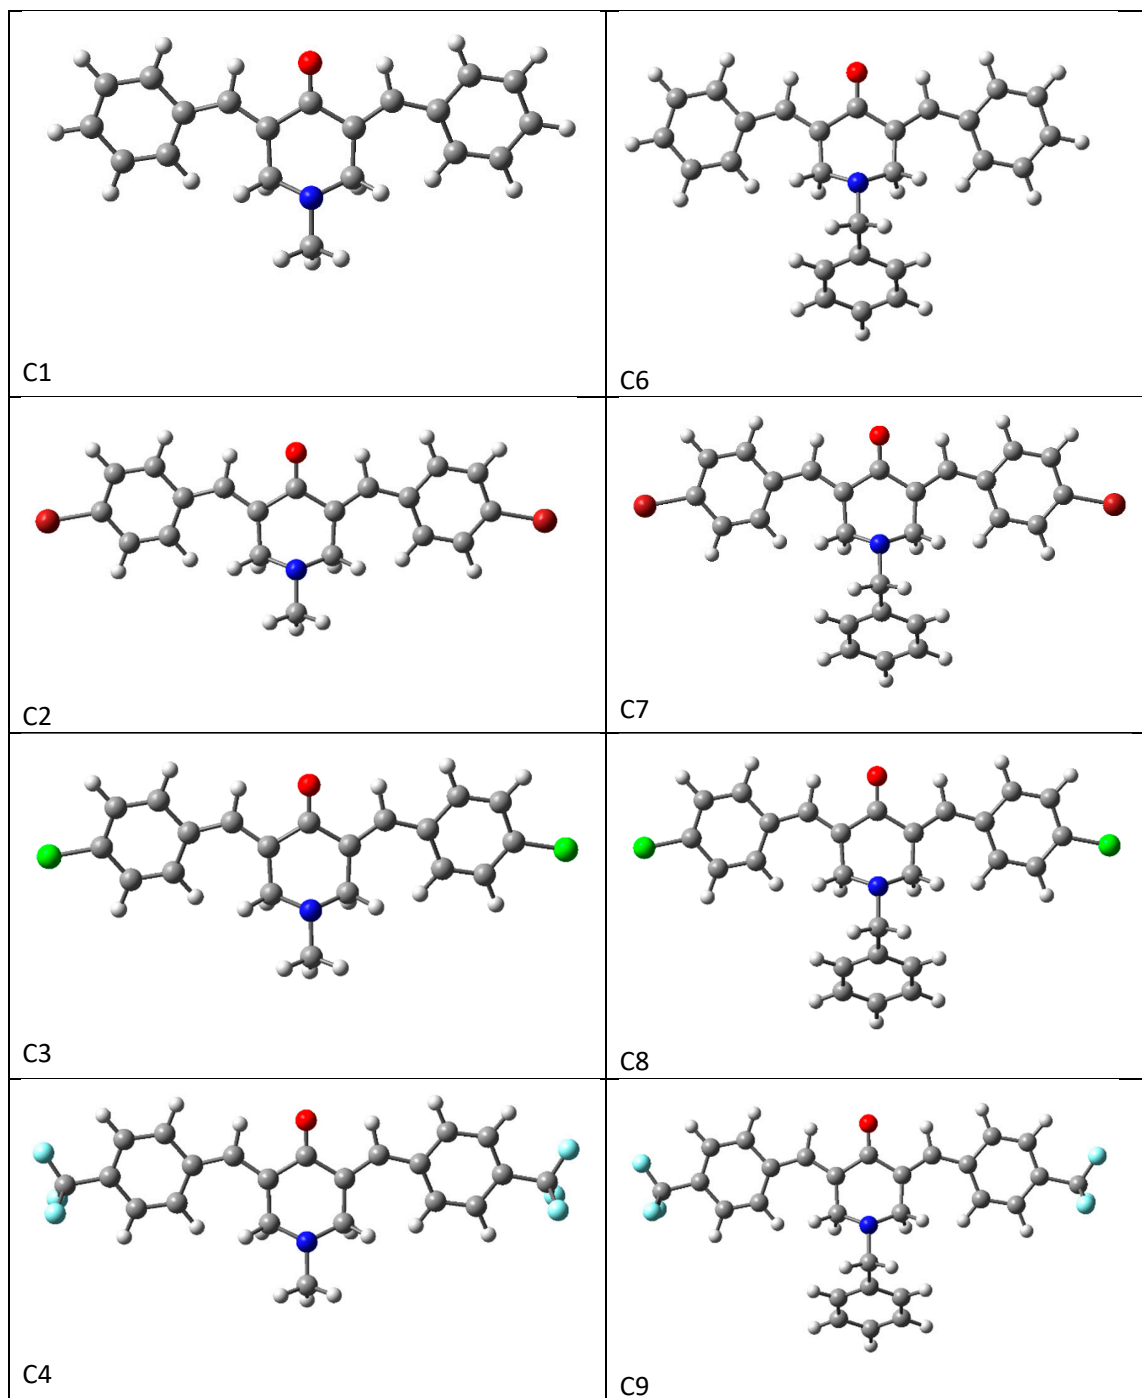

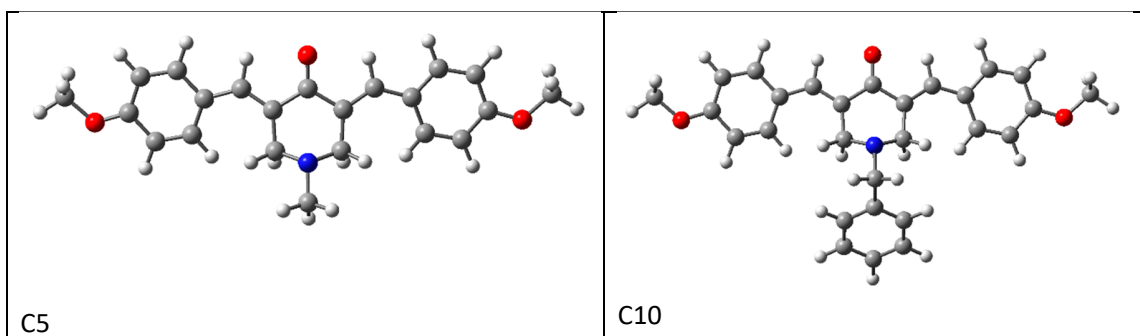

**Table S2.** Optimized geometries for singlet dications of compounds 1 -10 at DFT M06/6-311+G(d,p) level

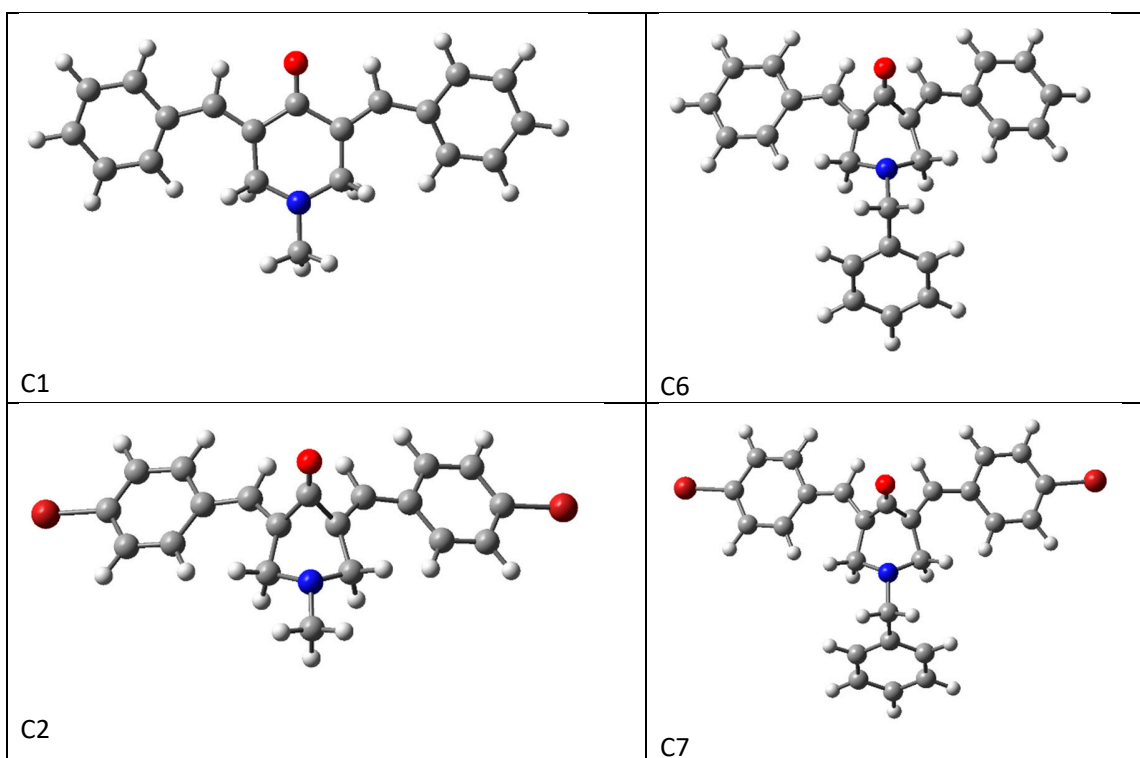

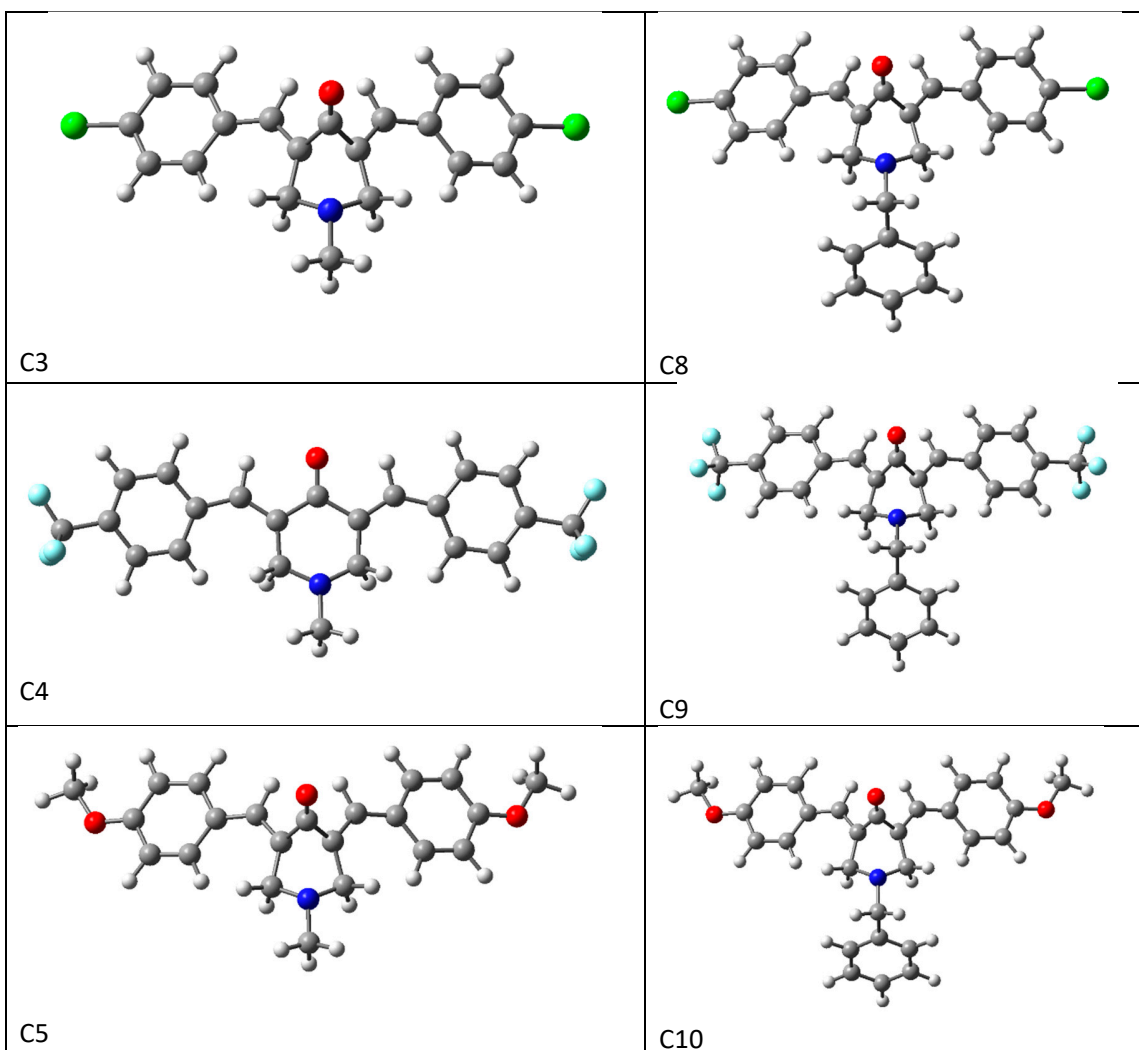

- Optimized geometry cartesian coordinates of all compounds (neutral, singlet dication and triplet dication)

Neutral species at DFT M06/6-311+G(d,p) level

# **C1**

O 1

|   |             |             |             |
|---|-------------|-------------|-------------|
| C | 1.18769500  | 1.18271000  | 0.07836400  |
| C | 0.00000100  | -1.09136500 | 0.03158700  |
| C | -1.18770100 | 1.18270600  | 0.07835900  |
| H | 1.19850000  | 1.63750400  | -0.94091100 |
| H | 2.06889300  | 1.57420900  | 0.60169100  |
| H | -1.19850200 | 1.63749700  | -0.94091700 |
| H | -2.06890400 | 1.57420300  | 0.60167900  |
| O | 0.00000400  | -2.30782900 | 0.05792300  |
| N | -0.00000600 | 1.60220900  | 0.79306900  |
| C | -0.00000900 | 3.03078500  | 1.00231700  |
| H | 0.88636000  | 3.32610200  | 1.57159400  |
| H | -0.00000800 | 3.59403600  | 0.04704800  |
| H | -0.88638200 | 3.32609900  | 1.57159000  |
| C | -1.27114800 | -0.31104700 | -0.00442400 |
| C | 1.27114700  | -0.31104200 | -0.00442200 |
| C | -2.40968700 | -1.02089400 | -0.07490100 |
| H | -2.27155500 | -2.10227600 | -0.04657400 |
| C | 2.40968800  | -1.02088700 | -0.07489900 |
| H | 2.27155700  | -2.10226900 | -0.04656600 |
| C | -3.79152600 | -0.56669700 | -0.13737600 |
| C | -4.78707100 | -1.42537700 | 0.34694200  |
| C | -4.18969600 | 0.66031600  | -0.68208400 |
| C | -6.12100500 | -1.05712800 | 0.33078900  |
| H | -4.49399800 | -2.39215100 | 0.74831400  |

|   |             |             |             |
|---|-------------|-------------|-------------|
| C | -5.52728700 | 1.02308200  | -0.71067400 |
| H | -3.45294200 | 1.32090600  | -1.12578300 |
| C | -6.49604300 | 0.17233100  | -0.19627500 |
| H | -6.87365000 | -1.73447400 | 0.72243600  |
| H | -5.81662700 | 1.97420600  | -1.14735000 |
| H | -7.54243700 | 0.46046400  | -0.21824400 |
| C | 3.79152800  | -0.56669200 | -0.13737400 |
| C | 4.78706900  | -1.42536900 | 0.34695400  |
| C | 4.18970300  | 0.66031400  | -0.68209600 |
| C | 6.12100500  | -1.05712400 | 0.33080100  |
| H | 4.49399300  | -2.39213800 | 0.74833600  |
| C | 5.52729500  | 1.02307600  | -0.71068700 |
| H | 3.45295300  | 1.32090000  | -1.12580600 |
| C | 6.49604700  | 0.17232900  | -0.19627600 |
| H | 6.87364700  | -1.73446700 | 0.72245700  |
| H | 5.81663900  | 1.97419400  | -1.14737300 |
| H | 7.54244200  | 0.46045900  | -0.21824500 |

C2

O 1

|   |             |             |             |
|---|-------------|-------------|-------------|
| C | 0.95964500  | 0.20247300  | 1.18748300  |
| C | -1.31177200 | 0.08139000  | 0.00000000  |
| C | 0.95964500  | 0.20247300  | -1.18748300 |
| H | 1.45086900  | -0.79967400 | 1.19857400  |
| H | 1.33187700  | 0.74069800  | 2.06801400  |
| H | 1.45086900  | -0.79967400 | -1.19857400 |
| H | 1.33187700  | 0.74069800  | -2.06801400 |
| O | -2.52805600 | 0.07049900  | 0.00000000  |
| N | 1.35240400  | 0.93194100  | 0.00000000  |

|   |             |             |             |
|---|-------------|-------------|-------------|
| C | 2.77199800  | 1.19740000  | 0.00000000  |
| H | 3.04437700  | 1.77819100  | 0.88613900  |
| H | 3.37287700  | 0.26551100  | 0.00000000  |
| H | 3.04437700  | 1.77819100  | -0.88613900 |
| C | -0.53028300 | 0.06817200  | -1.27095900 |
| C | -0.53028300 | 0.06817200  | 1.27095900  |
| C | -1.23745800 | -0.02810100 | -2.40904500 |
| H | -2.31936800 | -0.03310100 | -2.27271500 |
| C | -1.23745800 | -0.02810100 | 2.40904500  |
| H | -2.31936800 | -0.03310100 | 2.27271500  |
| C | -0.77748000 | -0.08202900 | -3.78857400 |
| C | -1.64153200 | 0.37788800  | -4.79058500 |
| C | 0.46262100  | -0.59896400 | -4.18171000 |
| C | -1.27426900 | 0.36852900  | -6.12404100 |
| H | -2.61927400 | 0.75896700  | -4.50771200 |
| C | 0.83709000  | -0.62904600 | -5.51516500 |
| H | 1.13363500  | -1.02430800 | -3.44360400 |
| C | -0.03015900 | -0.13450400 | -6.47755900 |
| H | -1.94946500 | 0.74011900  | -6.88726200 |
| H | 1.79497600  | -1.04473000 | -5.80905400 |
| C | -0.77748000 | -0.08202900 | 3.78857400  |
| C | -1.64153200 | 0.37788800  | 4.79058500  |
| C | 0.46262100  | -0.59896400 | 4.18171000  |
| C | -1.27426900 | 0.36852900  | 6.12404100  |
| H | -2.61927400 | 0.75896700  | 4.50771200  |
| C | 0.83709000  | -0.62904600 | 5.51516500  |
| H | 1.13363500  | -1.02430800 | 3.44360400  |
| C | -0.03015900 | -0.13450400 | 6.47755900  |
| H | -1.94946500 | 0.74011900  | 6.88726200  |

|     |             |             |             |
|-----|-------------|-------------|-------------|
| H   | 1.79497600  | -1.04473000 | 5.80905400  |
| Br  | 0.48100100  | -0.16844500 | -8.30196000 |
| Br  | 0.48100100  | -0.16844500 | 8.30196000  |
| C3  |             |             |             |
| O 1 |             |             |             |
| C   | 1.07314600  | 0.13969300  | 1.18789700  |
| C   | -1.19990700 | 0.05895300  | 0.00000000  |
| C   | 1.07314600  | 0.13969300  | -1.18789700 |
| H   | 1.54449000  | -0.87203900 | 1.20055200  |
| H   | 1.45580000  | 0.67147600  | 2.06797800  |
| H   | 1.54449000  | -0.87203900 | -1.20055200 |
| H   | 1.45580000  | 0.67147600  | -2.06797800 |
| O   | -2.41636300 | 0.06767000  | 0.00000000  |
| N   | 1.48106400  | 0.86020100  | 0.00000000  |
| C   | 2.90590500  | 1.09563400  | 0.00000000  |
| H   | 3.19050900  | 1.67054000  | 0.88613400  |
| H   | 3.48677000  | 0.15116300  | 0.00000000  |
| H   | 3.19050900  | 1.67054000  | -0.88613400 |
| C   | -0.41905500 | 0.03402700  | -1.27097400 |
| C   | -0.41905500 | 0.03402700  | 1.27097400  |
| C   | -1.12894700 | -0.04645400 | -2.40875200 |
| H   | -2.21047900 | -0.03258600 | -2.27009100 |
| C   | -1.12894700 | -0.04645400 | 2.40875200  |
| H   | -2.21047900 | -0.03258600 | 2.27009100  |
| C   | -0.67473500 | -0.10472400 | -3.78968600 |
| C   | -1.53991100 | 0.36279600  | -4.78749000 |
| C   | 0.55938700  | -0.63145800 | -4.18953400 |
| C   | -1.17987800 | 0.35147000  | -6.12232700 |



|    |             |             |             |
|----|-------------|-------------|-------------|
| H  | -2.51294700 | 0.75167600  | -4.49944800 |
| C  | 0.92738800  | -0.66330000 | -5.52428600 |
| H  | 1.23042200  | -1.06306700 | -3.45533900 |
| C  | 0.05828300  | -0.16111600 | -6.48011900 |
| H  | -1.85177000 | 0.72769500  | -6.88609400 |
| H  | 1.87960500  | -1.08437300 | -5.82872800 |
| C  | -0.67473500 | -0.10472400 | 3.78968600  |
| C  | -1.53991100 | 0.36279600  | 4.78749000  |
| C  | 0.55938700  | -0.63145800 | 4.18953400  |
| C  | -1.17987800 | 0.35147000  | 6.12232700  |
| H  | -2.51294700 | 0.75167600  | 4.49944800  |
| C  | 0.92738800  | -0.66330000 | 5.52428600  |
| H  | 1.23042200  | -1.06306700 | 3.45533900  |
| C  | 0.05828300  | -0.16111600 | 6.48011900  |
| H  | -1.85177000 | 0.72769500  | 6.88609400  |
| H  | 1.87960500  | -1.08437300 | 5.82872800  |
| Cl | 0.52003800  | -0.19268600 | -8.16096300 |
| Cl | 0.52003800  | -0.19268600 | 8.16096300  |

C4

O 1

|   |             |             |             |
|---|-------------|-------------|-------------|
| C | 1.18681400  | -0.92930900 | -0.24560000 |
| C | 0.00000400  | 1.34124400  | -0.10445800 |
| C | -1.18685800 | -0.92928400 | -0.24554100 |
| H | 1.19417100  | -1.43303500 | 0.75003000  |
| H | 2.06770200  | -1.29631000 | -0.78635900 |
| H | -1.19416200 | -1.43298500 | 0.75010100  |
| H | -2.06778200 | -1.29628900 | -0.78623900 |
| O | 0.00002100  | 2.55623800  | -0.09070400 |

|   |             |             |             |
|---|-------------|-------------|-------------|
| N | -0.00004400 | -1.30813700 | -0.98303600 |
| C | -0.00006500 | -2.72309600 | -1.27537300 |
| H | 0.88591400  | -2.98432900 | -1.86124200 |
| H | -0.00004900 | -3.34103800 | -0.35502000 |
| H | -0.88607700 | -2.98431200 | -1.86120000 |
| C | -1.27209800 | 0.55875300  | -0.09118200 |
| C | 1.27208600  | 0.55872300  | -0.09120200 |
| C | -2.40797800 | 1.26500600  | 0.02480400  |
| H | -2.27455400 | 2.34702000  | 0.04342100  |
| C | 2.40797800  | 1.26495700  | 0.02480000  |
| H | 2.27456200  | 2.34697300  | 0.04342500  |
| C | -3.78634700 | 0.79737700  | 0.08198400  |
| C | -4.79288300 | 1.65296100  | -0.37820400 |
| C | -4.16456900 | -0.44698800 | 0.60378100  |
| C | -6.12334400 | 1.27134500  | -0.36388700 |
| H | -4.51676800 | 2.63119800  | -0.76182900 |
| C | -5.49284400 | -0.82699400 | 0.63398000  |
| H | -3.41748500 | -1.10847200 | 1.02750700  |
| C | -6.47286000 | 0.02730100  | 0.14058700  |
| H | -6.88984300 | 1.94154900  | -0.73700300 |
| H | -5.77556600 | -1.78897600 | 1.05172500  |
| C | 3.78634900  | 0.79733100  | 0.08197600  |
| C | 4.79287900  | 1.65294100  | -0.37817800 |
| C | 4.16458500  | -0.44704600 | 0.60373800  |
| C | 6.12334500  | 1.27134000  | -0.36387100 |
| H | 4.51675500  | 2.63118700  | -0.76177400 |
| C | 5.49286400  | -0.82703800 | 0.63392600  |
| H | 3.41751200  | -1.10855100 | 1.02744600  |
| C | 6.47287200  | 0.02728000  | 0.14055600  |

|   |             |             |             |
|---|-------------|-------------|-------------|
| H | 6.88983600  | 1.94156400  | -0.73696600 |
| H | 5.77559700  | -1.78903000 | 1.05164100  |
| C | 7.89904400  | -0.42362100 | 0.19185800  |
| C | -7.89902400 | -0.42363000 | 0.19186000  |
| F | 8.73985800  | 0.47007800  | -0.32966700 |
| F | 8.07261500  | -1.57225000 | -0.47735300 |
| F | 8.29421600  | -0.65481700 | 1.45210100  |
| F | -8.73987000 | 0.47015100  | -0.32947000 |
| F | -8.07259700 | -1.57213800 | -0.47756200 |
| F | -8.29414700 | -0.65507100 | 1.45207200  |

C5

O 1

|   |             |             |             |
|---|-------------|-------------|-------------|
| C | 1.18818500  | 1.18642600  | 0.12630200  |
| C | 0.00000900  | -1.08699500 | 0.09221500  |
| C | -1.18825900 | 1.18638200  | 0.12628100  |
| H | 1.20527400  | 1.64257400  | -0.89266100 |
| H | 2.06757600  | 1.57555200  | 0.65501200  |
| H | -1.20534100 | 1.64252100  | -0.89268600 |
| H | -2.06768000 | 1.57547600  | 0.65496500  |
| O | 0.00003400  | -2.30501800 | 0.13035800  |
| N | -0.00005200 | 1.61150200  | 0.83668200  |
| C | -0.00008100 | 3.04079500  | 1.03673600  |
| H | 0.88634900  | 3.33999600  | 1.60413500  |
| H | -0.00008200 | 3.59862200  | 0.07809200  |
| H | -0.88653300 | 3.33996300  | 1.60411800  |
| C | -1.26865600 | -0.30770400 | 0.04622600  |
| C | 1.26864400  | -0.30765800 | 0.04623200  |
| C | -2.40842300 | -1.01735300 | -0.03290100 |

|   |             |             |             |
|---|-------------|-------------|-------------|
| H | -2.26616300 | -2.09813200 | 0.00245700  |
| C | 2.40842900  | -1.01728500 | -0.03288100 |
| H | 2.26617900  | -2.09806300 | 0.00254800  |
| C | -3.78870000 | -0.57485900 | -0.12104300 |
| C | -4.79162500 | -1.45540200 | 0.29356100  |
| C | -4.19802600 | 0.66899400  | -0.63010900 |
| C | -6.13458600 | -1.11608800 | 0.25552100  |
| H | -4.50449100 | -2.43529700 | 0.66663600  |
| C | -5.53037300 | 1.01577300  | -0.68863300 |
| H | -3.46329300 | 1.36150500  | -1.02540800 |
| C | -6.51075900 | 0.13156200  | -0.23588200 |
| H | -6.87456700 | -1.82958700 | 0.59939800  |
| H | -5.84816700 | 1.97047400  | -1.09549700 |
| C | 3.78871300  | -0.57480500 | -0.12105400 |
| C | 4.79161300  | -1.45529800 | 0.29371700  |
| C | 4.19808100  | 0.66895400  | -0.63032300 |
| C | 6.13458000  | -1.11601200 | 0.25567000  |
| H | 4.50445200  | -2.43512800 | 0.66694200  |
| C | 5.53043600  | 1.01570000  | -0.68885900 |
| H | 3.46338200  | 1.36140300  | -1.02578500 |
| C | 6.51079200  | 0.13155100  | -0.23592100 |
| H | 6.87453900  | -1.82946800 | 0.59968900  |
| H | 5.84826000  | 1.97032400  | -1.09587900 |
| C | -8.81470700 | -0.29722100 | 0.09378700  |
| H | -8.72066300 | -0.54374700 | 1.15910700  |
| H | -9.75147100 | 0.23615000  | -0.06748600 |
| H | -8.82537500 | -1.22644200 | -0.49023900 |
| C | 8.81472000  | -0.29721600 | 0.09390200  |
| H | 8.82539200  | -1.22653600 | -0.48996800 |

|   |             |             |             |
|---|-------------|-------------|-------------|
| H | 9.75149900  | 0.23611100  | -0.06742800 |
| H | 8.72063400  | -0.54356200 | 1.15925900  |
| O | -7.78656100 | 0.56511600  | -0.32898100 |
| O | 7.78660400  | 0.56506700  | -0.32904800 |

- Singlet dication species at DFT M06/6-311+G(d,p) level

C1

2 1

|   |             |             |             |
|---|-------------|-------------|-------------|
| C | 1.24075200  | 1.34047000  | 0.13235100  |
| C | 0.00000200  | -0.88826000 | 0.12104800  |
| C | -1.24076000 | 1.34046500  | 0.13235600  |
| H | 1.57527900  | 1.70705500  | -0.87067700 |
| H | 2.00430500  | 1.74326500  | 0.81741200  |
| H | -1.57529800 | 1.70705300  | -0.87066700 |
| H | -2.00431100 | 1.74325100  | 0.81742500  |
| O | 0.00000500  | -2.09246100 | 0.21879400  |
| N | -0.00000500 | 1.97265400  | 0.41809700  |
| C | -0.00000800 | 3.41961700  | 0.53349800  |
| H | 0.88646200  | 3.74715200  | 1.08034900  |
| H | -0.00001300 | 3.90118200  | -0.45537900 |
| H | -0.88647800 | 3.74714700  | 1.08035400  |
| C | -1.29193200 | -0.13272300 | 0.07731800  |
| C | 1.29193100  | -0.13271800 | 0.07731800  |
| C | -2.42936500 | -0.89808400 | 0.01129400  |
| H | -2.21628000 | -1.96597700 | 0.07440600  |
| C | 2.42936700  | -0.89807700 | 0.01130100  |
| H | 2.21628300  | -1.96596900 | 0.07443000  |
| C | -3.81226700 | -0.57612700 | -0.09298000 |
| C | -4.72158400 | -1.64830300 | 0.14284500  |

|   |             |             |             |
|---|-------------|-------------|-------------|
| C | -4.34319400 | 0.69509600  | -0.41922500 |
| C | -6.08137800 | -1.44820000 | 0.10804000  |
| H | -4.32121600 | -2.63198700 | 0.37087700  |
| C | -5.70065400 | 0.88668100  | -0.46725500 |
| H | -3.69454800 | 1.52490100  | -0.67294700 |
| C | -6.57637000 | -0.18147400 | -0.19410300 |
| H | -6.76252100 | -2.26809500 | 0.30479800  |
| H | -6.10796800 | 1.85653200  | -0.73072200 |
| H | -7.64842600 | -0.01600600 | -0.23771100 |
| C | 3.81226900  | -0.57612300 | -0.09297900 |
| C | 4.72158500  | -1.64829000 | 0.14288800  |
| C | 4.34319900  | 0.69508900  | -0.41926900 |
| C | 6.08137900  | -1.44818900 | 0.10808300  |
| H | 4.32121500  | -2.63196600 | 0.37095300  |
| C | 5.70065900  | 0.88667100  | -0.46730100 |
| H | 3.69455500  | 1.52488300  | -0.67303200 |
| C | 6.57637300  | -0.18147500 | -0.19410400 |
| H | 6.76252100  | -2.26807800 | 0.30487300  |
| H | 6.10797500  | 1.85651100  | -0.73080500 |
| H | 7.64843000  | -0.01600900 | -0.23771400 |

C2

2 1

|   |             |            |             |
|---|-------------|------------|-------------|
| C | 0.43045800  | 2.51849300 | 1.16066700  |
| C | -1.65755000 | 1.82917500 | 0.00000000  |
| C | 0.43045800  | 2.51849300 | -1.16066700 |
| H | 1.46746200  | 2.16175800 | 1.32386100  |
| H | 0.08717700  | 3.05722800 | 2.05074100  |
| H | 1.46746200  | 2.16175800 | -1.32386100 |

|   |             |             |             |
|---|-------------|-------------|-------------|
| H | 0.08717700  | 3.05722800  | -2.05074100 |
| O | -2.79878100 | 2.07118600  | 0.00000000  |
| N | 0.30273900  | 3.36979700  | 0.00000000  |
| C | 1.17010100  | 4.53410000  | 0.00000000  |
| H | 0.96704100  | 5.14280600  | 0.88341400  |
| H | 2.23519400  | 4.24904100  | 0.00000000  |
| H | 0.96704100  | 5.14280600  | -0.88341400 |
| C | -0.47795200 | 1.35996800  | -0.82478400 |
| C | -0.47795200 | 1.35996800  | 0.82478400  |
| C | -0.72177200 | 0.17278800  | -1.58345100 |
| H | -1.33360300 | -0.57777200 | -1.07940600 |
| C | -0.72177200 | 0.17278800  | 1.58345100  |
| H | -1.33360300 | -0.57777200 | 1.07940600  |
| C | -0.38693700 | -0.15138200 | -2.88695900 |
| C | -0.88838400 | -1.39265200 | -3.39651600 |
| C | 0.41057400  | 0.65586700  | -3.75768400 |
| C | -0.62537400 | -1.79711900 | -4.67251100 |
| H | -1.49897300 | -2.01800300 | -2.75107300 |
| C | 0.67758400  | 0.25123700  | -5.03150800 |
| H | 0.81945100  | 1.59832200  | -3.41684500 |
| C | 0.15970100  | -0.97523400 | -5.50066200 |
| H | -1.01297200 | -2.73498900 | -5.05457900 |
| H | 1.28322600  | 0.86078700  | -5.69293200 |
| C | -0.38693700 | -0.15138200 | 2.88695900  |
| C | -0.88838400 | -1.39265200 | 3.39651600  |
| C | 0.41057400  | 0.65586700  | 3.75768400  |
| C | -0.62537400 | -1.79711900 | 4.67251100  |
| H | -1.49897300 | -2.01800300 | 2.75107300  |
| C | 0.67758400  | 0.25123700  | 5.03150800  |

|    |             |             |             |
|----|-------------|-------------|-------------|
| H  | 0.81945100  | 1.59832200  | 3.41684500  |
| C  | 0.15970100  | -0.97523400 | 5.50066200  |
| H  | -1.01297200 | -2.73498900 | 5.05457900  |
| H  | 1.28322600  | 0.86078700  | 5.69293200  |
| Br | 0.52097400  | -1.50386600 | -7.22930800 |
| Br | 0.52097400  | -1.50386600 | 7.22930800  |

C3

2 1

|   |             |             |             |
|---|-------------|-------------|-------------|
| C | 2.24111900  | -0.36006200 | 1.16007000  |
| C | 1.39234000  | 1.66773400  | 0.00000000  |
| C | 2.24111900  | -0.36006200 | -1.16007000 |
| H | 1.96893100  | -1.42278400 | 1.31988100  |
| H | 2.75022800  | 0.02318900  | 2.05126400  |
| H | 1.96893100  | -1.42278400 | -1.31988100 |
| H | 2.75022800  | 0.02318900  | -2.05126400 |
| O | 1.54638600  | 2.82365800  | 0.00000000  |
| N | 3.07984200  | -0.16231600 | 0.00000000  |
| C | 4.31070100  | -0.93243600 | 0.00000000  |
| H | 4.90111400  | -0.68122100 | 0.88348500  |
| H | 4.11225200  | -2.01705400 | 0.00000000  |
| H | 4.90111400  | -0.68122100 | -0.88348500 |
| C | 1.01440700  | 0.45460800  | -0.82476500 |
| C | 1.01440700  | 0.45460800  | 0.82476500  |
| C | -0.18555400 | 0.60710600  | -1.58673200 |
| H | -0.98262900 | 1.16090700  | -1.08688100 |
| C | -0.18555400 | 0.60710600  | 1.58673200  |
| H | -0.98262900 | 1.16090700  | 1.08688100  |
| C | -0.47719300 | 0.24696600  | -2.89127800 |



|    |             |             |             |
|----|-------------|-------------|-------------|
| C  | -1.74874800 | 0.65413500  | -3.41057800 |
| C  | 0.39358500  | -0.49122400 | -3.75329600 |
| C  | -2.12322200 | 0.35860200  | -4.68825500 |
| H  | -2.42225300 | 1.21861700  | -2.77177600 |
| C  | 0.02030600  | -0.79186800 | -5.02859600 |
| H  | 1.35998700  | -0.82890200 | -3.40222000 |
| C  | -1.23796200 | -0.36655700 | -5.50519800 |
| H  | -3.08238400 | 0.67241600  | -5.08458200 |
| H  | 0.67279200  | -1.35318600 | -5.68801900 |
| C  | -0.47719300 | 0.24696600  | 2.89127800  |
| C  | -1.74874800 | 0.65413500  | 3.41057800  |
| C  | 0.39358500  | -0.49122400 | 3.75329600  |
| C  | -2.12322200 | 0.35860200  | 4.68825500  |
| H  | -2.42225300 | 1.21861700  | 2.77177600  |
| C  | 0.02030600  | -0.79186800 | 5.02859600  |
| H  | 1.35998700  | -0.82890200 | 3.40222000  |
| C  | -1.23796200 | -0.36655700 | 5.50519800  |
| H  | -3.08238400 | 0.67241600  | 5.08458200  |
| H  | 0.67279200  | -1.35318600 | 5.68801900  |
| Cl | -1.68685100 | -0.74018600 | -7.08928600 |
| Cl | -1.68685100 | -0.74018600 | 7.08928600  |

C4

2 1

|   |             |             |             |
|---|-------------|-------------|-------------|
| C | -1.24232300 | 1.30062800  | -0.18657300 |
| C | 0.00000000  | -0.92770600 | -0.16358500 |
| C | 1.24233400  | 1.30062200  | -0.18655900 |
| H | -1.60696700 | 1.67288200  | 0.80371300  |
| H | -1.99015700 | 1.70026400  | -0.89273900 |

|   |             |             |             |
|---|-------------|-------------|-------------|
| H | 1.60696700  | 1.67287500  | 0.80373200  |
| H | 1.99017900  | 1.70025600  | -0.89271400 |
| O | -0.00000200 | -2.13312200 | -0.24176900 |
| N | 0.00000800  | 1.94155500  | -0.43722900 |
| C | 0.00000900  | 3.38979600  | -0.54545700 |
| H | -0.88707400 | 3.72089800  | -1.08915900 |
| H | -0.00003700 | 3.86296000  | 0.44734800  |
| H | 0.88713900  | 3.72090300  | -1.08907800 |
| C | 1.29141500  | -0.17137600 | -0.13008900 |
| C | -1.29141200 | -0.17137100 | -0.13009600 |
| C | 2.42915000  | -0.93763300 | -0.06862200 |
| H | 2.21300400  | -2.00547200 | -0.11901300 |
| C | -2.42915100 | -0.93762200 | -0.06862600 |
| H | -2.21300800 | -2.00546200 | -0.11900800 |
| C | 3.81522600  | -0.61892300 | 0.02040200  |
| C | 4.71433400  | -1.70265600 | -0.18520600 |
| C | 4.35700900  | 0.65734000  | 0.30197300  |
| C | 6.07925000  | -1.51677200 | -0.15898800 |
| H | 4.30872700  | -2.69083800 | -0.38184600 |
| C | 5.71430400  | 0.83920000  | 0.34123700  |
| H | 3.72005700  | 1.50426400  | 0.52519200  |
| C | 6.57866500  | -0.24799500 | 0.10222000  |
| H | 6.75613300  | -2.34615200 | -0.32921700 |
| H | 6.13831700  | 1.81218300  | 0.56997100  |
| C | -3.81522600 | -0.61891000 | 0.02039100  |
| C | -4.71433200 | -1.70265500 | -0.18517300 |
| C | -4.35701400 | 0.65736100  | 0.30191400  |
| C | -6.07924900 | -1.51677600 | -0.15895100 |
| H | -4.30872300 | -2.69084200 | -0.38178100 |

|   |             |             |             |
|---|-------------|-------------|-------------|
| C | -5.71431000 | 0.83921700  | 0.34118000  |
| H | -3.72006700 | 1.50429900  | 0.52509100  |
| C | -6.57866800 | -0.24799100 | 0.10221300  |
| H | -6.75612900 | -2.34616500 | -0.32914500 |
| H | -6.13832400 | 1.81220900  | 0.56987300  |
| C | -8.06820300 | 0.02130400  | 0.14436400  |
| C | 8.06819900  | 0.02130700  | 0.14436100  |
| F | -8.77228000 | -1.08531500 | 0.00262200  |
| F | -8.38369200 | 0.86354600  | -0.83482100 |
| F | -8.38423600 | 0.58979800  | 1.30218800  |
| F | 8.77228000  | -1.08530800 | 0.00261000  |
| F | 8.38367200  | 0.86355200  | -0.83482900 |
| F | 8.38424200  | 0.58980300  | 1.30218000  |

C5

2 1

|   |             |            |             |
|---|-------------|------------|-------------|
| C | 1.15900800  | 2.33720100 | -0.34634700 |
| C | 0.00000000  | 1.44106700 | 1.67340000  |
| C | -1.15900600 | 2.33720100 | -0.34634900 |
| H | 1.32292000  | 2.06633800 | -1.40946800 |
| H | 2.05004100  | 2.84632200 | 0.03792900  |
| H | -1.32291700 | 2.06633900 | -1.40946900 |
| H | -2.05004000 | 2.84632400 | 0.03792700  |
| O | 0.00000000  | 1.54783200 | 2.83896100  |
| N | 0.00000100  | 3.17811000 | -0.15740800 |
| C | 0.00000200  | 4.39269100 | -0.95055500 |
| H | 0.88326200  | 4.98855200 | -0.71099200 |
| H | 0.00000300  | 4.17491300 | -2.03200200 |
| H | -0.88325800 | 4.98855300 | -0.71099400 |

|   |             |             |             |
|---|-------------|-------------|-------------|
| C | -0.82606900 | 1.10544300  | 0.46167600  |
| C | 0.82606900  | 1.10544200  | 0.46167700  |
| C | -1.59122200 | -0.10472600 | 0.57148400  |
| H | -1.09638600 | -0.91116500 | 1.11563200  |
| C | 1.59122100  | -0.10472700 | 0.57148300  |
| H | 1.09638400  | -0.91116800 | 1.11562900  |
| C | -2.88263000 | -0.38630000 | 0.18850700  |
| C | -3.41188900 | -1.66944200 | 0.55796800  |
| C | -3.75157900 | 0.50292800  | -0.53215000 |
| C | -4.68488600 | -2.04095700 | 0.26200800  |
| H | -2.77050400 | -2.35711400 | 1.10253900  |
| C | -5.01876000 | 0.14050600  | -0.83703600 |
| H | -3.39902700 | 1.47717100  | -0.84433600 |
| C | -5.51871100 | -1.13348200 | -0.44056900 |
| H | -5.05772800 | -3.01253600 | 0.56263900  |
| H | -5.69196800 | 0.79553700  | -1.37925700 |
| C | 2.88262900  | -0.38630100 | 0.18850600  |
| C | 3.41188700  | -1.66944400 | 0.55796500  |
| C | 3.75157900  | 0.50292800  | -0.53214800 |
| C | 4.68488500  | -2.04095900 | 0.26200600  |
| H | 2.77050100  | -2.35711800 | 1.10253400  |
| C | 5.01876000  | 0.14050700  | -0.83703300 |
| H | 3.39902700  | 1.47717200  | -0.84433100 |
| C | 5.51871100  | -1.13348200 | -0.44056800 |
| H | 5.05772700  | -3.01253900 | 0.56263500  |
| H | 5.69196900  | 0.79553900  | -1.37925200 |
| C | -7.40102800 | -2.60784400 | -0.42427100 |
| H | -7.42102800 | -2.73090700 | 0.66103600  |
| H | -8.41398600 | -2.51481200 | -0.80723200 |

|   |             |             |             |
|---|-------------|-------------|-------------|
| H | -6.89398200 | -3.44553500 | -0.90887900 |
| C | 7.40102700  | -2.60784500 | -0.42427200 |
| H | 6.89398100  | -3.44553400 | -0.90888200 |
| H | 8.41398500  | -2.51481300 | -0.80723300 |
| H | 7.42102700  | -2.73091100 | 0.66103500  |
| O | -6.74865000 | -1.37065500 | -0.76808400 |
| O | 6.74865000  | -1.37065500 | -0.76808300 |

C6

2 1

|   |             |             |             |
|---|-------------|-------------|-------------|
| C | 1.13690700  | 0.77539400  | 0.82365500  |
| C | 0.07378500  | -1.13061300 | 1.97824600  |
| C | -1.18069000 | 0.65320700  | 0.83357900  |
| H | 1.24710500  | 1.21566300  | -0.18478700 |
| H | 2.02717100  | 0.99593900  | 1.42341900  |
| H | -1.34849100 | 1.07998100  | -0.17286400 |
| H | -2.08214200 | 0.77916200  | 1.44382400  |
| O | 0.10201700  | -1.67529200 | 3.00645500  |
| N | -0.04629400 | 1.23419500  | 1.52365300  |
| C | -0.76552200 | -0.79545400 | 0.74882200  |
| C | 0.87652000  | -0.70796000 | 0.74845100  |
| C | -1.46580200 | -1.90319100 | 0.19440800  |
| H | -0.91459800 | -2.84551900 | 0.18257500  |
| C | 1.69342800  | -1.74539900 | 0.21999300  |
| H | 1.25579500  | -2.74544200 | 0.25543200  |
| C | -2.77702800 | -2.00753300 | -0.25703500 |
| C | -3.22068500 | -3.31062200 | -0.64014000 |
| C | -3.69081000 | -0.91695800 | -0.36130900 |
| C | -4.50103500 | -3.51280100 | -1.08696200 |

|   |             |             |             |
|---|-------------|-------------|-------------|
| H | -2.53013900 | -4.14605100 | -0.56444300 |
| C | -4.96601800 | -1.13226900 | -0.81112600 |
| H | -3.38394900 | 0.08724200  | -0.09840000 |
| C | -5.37336800 | -2.42521900 | -1.16967900 |
| H | -4.83660000 | -4.50346100 | -1.37143100 |
| H | -5.66441000 | -0.30729000 | -0.89369400 |
| C | 3.00320200  | -1.71445000 | -0.24685900 |
| C | 3.60268600  | -2.97342700 | -0.55896700 |
| C | 3.76993200  | -0.52638100 | -0.43649500 |
| C | 4.89341800  | -3.04202400 | -1.01654200 |
| H | 3.02428100  | -3.88235000 | -0.41775500 |
| C | 5.05457600  | -0.60854900 | -0.90256000 |
| H | 3.34048400  | 0.44638100  | -0.23303200 |
| C | 5.61860300  | -1.86068000 | -1.18710600 |
| H | 5.34868700  | -3.99908000 | -1.24398300 |
| H | 5.64054800  | 0.29073900  | -1.05467400 |
| C | -0.12334700 | 2.67799400  | 1.81414900  |
| H | 0.75786400  | 2.92520900  | 2.41593800  |
| H | -1.00039200 | 2.82351400  | 2.45375000  |
| C | -0.20177300 | 3.53370500  | 0.58238900  |
| C | -1.43978000 | 3.86431300  | 0.03221100  |
| C | 0.95799300  | 3.99741600  | -0.03737200 |
| C | -1.51756500 | 4.63041600  | -1.12185300 |
| H | -2.35389700 | 3.55786000  | 0.53898000  |
| C | 0.88288400  | 4.76447500  | -1.19143300 |
| H | 1.92828900  | 3.79576200  | 0.41450900  |
| C | -0.35528600 | 5.07578000  | -1.73773400 |
| H | -2.48580800 | 4.90267100  | -1.52933200 |
| H | 1.78986100  | 5.14136300  | -1.65297700 |

|   |             |             |             |
|---|-------------|-------------|-------------|
| H | -0.41514100 | 5.68841600  | -2.63114400 |
| H | -6.38875200 | -2.58209300 | -1.52242100 |
| H | 6.64081400  | -1.91067100 | -1.55107100 |

C7

2 1

|   |             |             |             |
|---|-------------|-------------|-------------|
| C | 1.16112300  | 1.49132800  | 1.07623800  |
| C | -0.00003200 | -0.19669700 | 2.46488700  |
| C | -1.16111800 | 1.49135700  | 1.07618600  |
| H | 1.31255600  | 1.76676000  | 0.01522100  |
| H | 2.05508100  | 1.75294100  | 1.65463600  |
| H | -1.31250700 | 1.76680800  | 0.01516700  |
| H | -2.05509100 | 1.75298200  | 1.65455500  |
| O | -0.00008700 | -0.60577000 | 3.55703900  |
| N | -0.00000200 | 2.11706200  | 1.67402500  |
| C | -0.82183300 | 0.02681400  | 1.20667400  |
| C | 0.82180000  | 0.02679300  | 1.20673200  |
| C | -1.58008800 | -1.11000200 | 0.79577700  |
| H | -1.07656000 | -2.07081900 | 0.91856100  |
| C | 1.58005000  | -1.11004000 | 0.79583200  |
| H | 1.07651000  | -2.07085000 | 0.91862600  |
| C | -2.89166500 | -1.20975500 | 0.35975300  |
| C | -3.41303300 | -2.52841900 | 0.16857800  |
| C | -3.75808300 | -0.10256800 | 0.10380500  |
| C | -4.70374300 | -2.73329100 | -0.22484700 |
| H | -2.76772800 | -3.38213800 | 0.35616400  |
| C | -5.04623000 | -0.30553900 | -0.29567200 |
| H | -3.39973600 | 0.91308200  | 0.21493800  |
| C | -5.53103800 | -1.62076600 | -0.45518800 |

|    |             |             |             |
|----|-------------|-------------|-------------|
| H  | -5.09766100 | -3.73454400 | -0.35711800 |
| H  | -5.70620300 | 0.53189800  | -0.49259100 |
| C  | 2.89161500  | -1.20980800 | 0.35979500  |
| C  | 3.41296200  | -2.52848100 | 0.16859900  |
| C  | 3.75805200  | -0.10262900 | 0.10385400  |
| C  | 4.70366300  | -2.73336800 | -0.22484000 |
| H  | 2.76764400  | -3.38219000 | 0.35618000  |
| C  | 5.04619000  | -0.30561700 | -0.29563500 |
| H  | 3.39972500  | 0.91302500  | 0.21500800  |
| C  | 5.53097600  | -1.62085300 | -0.45517400 |
| H  | 5.09756400  | -3.73462600 | -0.35712800 |
| H  | 5.70617800  | 0.53180900  | -0.49254600 |
| C  | 0.00001500  | 3.58905300  | 1.72792600  |
| H  | 0.88022700  | 3.88266500  | 2.31040800  |
| H  | -0.88023900 | 3.88268600  | 2.31033300  |
| C  | 0.00008100  | 4.24558000  | 0.37718300  |
| C  | -1.20043100 | 4.54636400  | -0.26485300 |
| C  | 1.20065800  | 4.54637700  | -0.26472800 |
| C  | -1.20197400 | 5.11912300  | -1.52897500 |
| H  | -2.14457400 | 4.37102000  | 0.24931700  |
| C  | 1.20232900  | 5.11913500  | -1.52884900 |
| H  | 2.14474700  | 4.37104300  | 0.24954400  |
| C  | 0.00020900  | 5.39792800  | -2.16519100 |
| H  | -2.14168500 | 5.37009500  | -2.01037000 |
| H  | 2.14208800  | 5.37011700  | -2.01014500 |
| H  | 0.00025800  | 5.85797200  | -3.14781900 |
| Br | -7.28162600 | -1.88173400 | -0.97817900 |
| Br | 7.28155100  | -1.88184200 | -0.97818200 |



C8

2 1

|   |             |             |             |
|---|-------------|-------------|-------------|
| C | 1.16080800  | 1.12407800  | 1.03789800  |
| C | -0.00003200 | -0.65168800 | 2.32054800  |
| C | -1.16082600 | 1.12410100  | 1.03788100  |
| H | 1.31346800  | 1.45924400  | -0.00584200 |
| H | 2.05391100  | 1.35250500  | 1.63149600  |
| H | -1.31346300 | 1.45926900  | -0.00586200 |
| H | -2.05393400 | 1.35254800  | 1.63146400  |
| O | -0.00004400 | -1.12550100 | 3.38594300  |
| N | -0.00000800 | 1.71692100  | 1.66803600  |
| C | -0.82324800 | -0.34606700 | 1.08185100  |
| C | 0.82319900  | -0.34608400 | 1.08186100  |
| C | -1.57998900 | -1.45224200 | 0.59133100  |
| H | -1.08022800 | -2.42074200 | 0.65523300  |
| C | 1.57992000  | -1.45227400 | 0.59133800  |
| H | 1.08013700  | -2.42076300 | 0.65523100  |
| C | -2.88551400 | -1.51748600 | 0.13172500  |
| C | -3.40523800 | -2.81661500 | -0.16979200 |
| C | -3.74529500 | -0.39078700 | -0.05463000 |
| C | -4.68566100 | -2.98664500 | -0.60897700 |
| H | -2.76554000 | -3.68421100 | -0.03419400 |
| C | -5.02385300 | -0.55731500 | -0.49669700 |
| H | -3.38936300 | 0.61195500  | 0.14417100  |
| C | -5.50299800 | -1.85506400 | -0.77103400 |
| H | -5.08306600 | -3.97083800 | -0.83029000 |
| H | -5.68364900 | 0.29054700  | -0.64267700 |
| C | 2.88544500  | -1.51754500 | 0.13173500  |
| C | 3.40513500  | -2.81668600 | -0.16979200 |

|    |             |             |             |
|----|-------------|-------------|-------------|
| C  | 3.74525800  | -0.39086800 | -0.05460700 |
| C  | 4.68555400  | -2.98674700 | -0.60897600 |
| H  | 2.76541300  | -3.68426600 | -0.03420400 |
| C  | 5.02381200  | -0.55742800 | -0.49667300 |
| H  | 3.38935400  | 0.61188100  | 0.14420200  |
| C  | 5.50292200  | -1.85518700 | -0.77102100 |
| H  | 5.08293200  | -3.97094800 | -0.83029900 |
| H  | 5.68363200  | 0.29041700  | -0.64264300 |
| C  | 0.00001000  | 3.18565500  | 1.78822700  |
| H  | 0.88034300  | 3.45318100  | 2.38281100  |
| H  | -0.88035200 | 3.45321300  | 2.38275400  |
| C  | 0.00007200  | 3.89918300  | 0.46627200  |
| C  | -1.20044000 | 4.22299200  | -0.16472500 |
| C  | 1.20064900  | 4.22294700  | -0.16462600 |
| C  | -1.20192700 | 4.83741100  | -1.40924400 |
| H  | -2.14461700 | 4.03076500  | 0.34337000  |
| C  | 1.20226500  | 4.83736500  | -1.40914500 |
| H  | 2.14477600  | 4.03067700  | 0.34354800  |
| C  | 0.00020100  | 5.13627800  | -2.03632100 |
| H  | -2.14156200 | 5.10502800  | -1.88175100 |
| H  | 2.14194900  | 5.10494400  | -1.88157400 |
| H  | 0.00025000  | 5.62810900  | -3.00345800 |
| Cl | -7.09329600 | -2.04864400 | -1.30976400 |
| Cl | 7.09321600  | -2.04880500 | -1.30975000 |

C9

2 1

|   |             |             |            |
|---|-------------|-------------|------------|
| C | 1.16158400  | 1.46533800  | 0.98433900 |
| C | -0.00017000 | -0.16791000 | 2.39778800 |

|   |             |             |             |
|---|-------------|-------------|-------------|
| C | -1.16160000 | 1.46547100  | 0.98418700  |
| H | 1.29427600  | 1.76664000  | -0.07078500 |
| H | 2.05981000  | 1.71847100  | 1.55858200  |
| H | -1.29412100 | 1.76678500  | -0.07095700 |
| H | -2.05986600 | 1.71870700  | 1.55832000  |
| O | -0.00027200 | -0.55436000 | 3.49350900  |
| N | -0.00001500 | 2.06600400  | 1.61410100  |
| C | -0.81801300 | 0.00243100  | 1.10616900  |
| C | 0.81781200  | 0.00233900  | 1.10628200  |
| C | -1.57875000 | -1.14380700 | 0.76113400  |
| H | -1.07519100 | -2.10138000 | 0.90894000  |
| C | 1.57846100  | -1.14398100 | 0.76128300  |
| H | 1.07481500  | -2.10150800 | 0.90909300  |
| C | -2.90688900 | -1.25777100 | 0.35000600  |
| C | -3.42468000 | -2.58007700 | 0.23230400  |
| C | -3.75995000 | -0.15890700 | 0.04165600  |
| C | -4.72410800 | -2.79718200 | -0.15720600 |
| H | -2.78208500 | -3.42465300 | 0.46459000  |
| C | -5.05075300 | -0.38454700 | -0.35114900 |
| H | -3.39504100 | 0.85874400  | 0.09793100  |
| C | -5.53110400 | -1.69975300 | -0.44686700 |
| H | -5.12229100 | -3.80206900 | -0.24120800 |
| H | -5.70887700 | 0.44399000  | -0.59362400 |
| C | 2.90658800  | -1.25805700 | 0.35016300  |
| C | 3.42427000  | -2.58040800 | 0.23245400  |
| C | 3.75973300  | -0.15926100 | 0.04179300  |
| C | 4.72366800  | -2.79761900 | -0.15709800 |
| H | 2.78161300  | -3.42493100 | 0.46476000  |
| C | 5.05050100  | -0.38500800 | -0.35105900 |

|   |             |             |             |
|---|-------------|-------------|-------------|
| H | 3.39491200  | 0.85842100  | 0.09808300  |
| C | 5.53074000  | -1.70025400 | -0.44679700 |
| H | 5.12176900  | -3.80253700 | -0.24111100 |
| H | 5.70868500  | 0.44347600  | -0.59355800 |
| C | 0.00005500  | 3.53679800  | 1.74245300  |
| H | 0.88119100  | 3.80060400  | 2.33688700  |
| H | -0.88133700 | 3.80069400  | 2.33646500  |
| C | 0.00041800  | 4.24051900  | 0.41643900  |
| C | -1.20123900 | 4.55965000  | -0.21564500 |
| C | 1.20245200  | 4.55997000  | -0.21477700 |
| C | -1.20186500 | 5.16978400  | -1.46195400 |
| H | -2.14565500 | 4.37067700  | 0.29306200  |
| C | 1.20382800  | 5.17010400  | -1.46108400 |
| H | 2.14654400  | 4.37125200  | 0.29462400  |
| C | 0.00117100  | 5.46638800  | -2.08918300 |
| H | -2.14106400 | 5.43605800  | -1.93581600 |
| H | 2.14330100  | 5.43663300  | -1.93426000 |
| H | 0.00145700  | 5.95433700  | -3.05822900 |
| C | -6.96897000 | -1.88759200 | -0.89829700 |
| C | 6.96857000  | -1.88821300 | -0.89829500 |
| F | -7.31045000 | -3.16181700 | -0.92363400 |
| F | -7.10885600 | -1.37717000 | -2.11559400 |
| F | -7.77676000 | -1.23815200 | -0.07090100 |
| F | 7.30993900  | -3.16246600 | -0.92365100 |
| F | 7.77645200  | -1.23884400 | -0.07093500 |
| F | 7.10843900  | -1.37779900 | -2.11559600 |

C10

2 1

|   |             |             |             |
|---|-------------|-------------|-------------|
| C | 1.16072100  | 1.22032800  | 1.06946200  |
| C | 0.00011200  | -0.55585400 | 2.37748800  |
| C | -1.16068100 | 1.22022800  | 1.06949300  |
| H | 1.32539200  | 1.51449100  | 0.01468900  |
| H | 2.05106700  | 1.46889400  | 1.65986700  |
| H | -1.32540900 | 1.51439100  | 0.01472700  |
| H | -2.05103100 | 1.46871000  | 1.65992600  |
| O | 0.00014300  | -1.03513800 | 3.44512600  |
| N | 0.00000000  | 1.84448800  | 1.66459400  |
| C | -0.82486400 | -0.24918300 | 1.15518800  |
| C | 0.82503600  | -0.24911300 | 1.15517100  |
| C | -1.58265800 | -1.35659900 | 0.64862000  |
| H | -1.08334800 | -2.32481100 | 0.71761800  |
| C | 1.58291100  | -1.35646600 | 0.64858400  |
| H | 1.08367800  | -2.32471700 | 0.71758600  |
| C | -2.87493900 | -1.41615000 | 0.17715500  |
| C | -3.39734500 | -2.71369200 | -0.14475800 |
| C | -3.74938300 | -0.29027900 | 0.00140400  |
| C | -4.67152000 | -2.89421500 | -0.58223400 |
| H | -2.75019000 | -3.57783100 | -0.02126400 |
| C | -5.01865400 | -0.45901600 | -0.43628100 |
| H | -3.39954900 | 0.71128400  | 0.21504900  |
| C | -5.51240200 | -1.76215400 | -0.72998500 |
| H | -5.03836000 | -3.88789600 | -0.80898600 |
| H | -5.69766100 | 0.37533200  | -0.57397600 |
| C | 2.87519200  | -1.41592300 | 0.17710200  |
| C | 3.39768000  | -2.71342800 | -0.14482100 |

|   |             |             |             |
|---|-------------|-------------|-------------|
| C | 3.74956100  | -0.28999400 | 0.00134900  |
| C | 4.67186400  | -2.89386800 | -0.58230400 |
| H | 2.75058200  | -3.57761000 | -0.02132400 |
| C | 5.01884200  | -0.45864700 | -0.43634400 |
| H | 3.39966700  | 0.71154500  | 0.21500300  |
| C | 5.51267300  | -1.76175200 | -0.73005500 |
| H | 5.03876700  | -3.88752400 | -0.80906100 |
| H | 5.69779500  | 0.37574500  | -0.57403600 |
| C | -0.00010200 | 3.31518200  | 1.70680700  |
| H | 0.87976700  | 3.61437300  | 2.28735200  |
| H | -0.87997100 | 3.61417700  | 2.28745000  |
| C | -0.00029400 | 3.97006900  | 0.35427300  |
| C | -1.20017800 | 4.26920700  | -0.28951800 |
| C | 1.19940100  | 4.26989100  | -0.28956100 |
| C | -1.20232100 | 4.83675500  | -1.55608300 |
| H | -2.14432400 | 4.09374700  | 0.22460900  |
| C | 1.20117600  | 4.83744500  | -1.55612400 |
| H | 2.14366700  | 4.09500900  | 0.22454300  |
| C | -0.00066200 | 5.11341000  | -2.19392800 |
| H | -2.14243700 | 5.08458900  | -2.03851100 |
| H | 2.14113400  | 5.08583200  | -2.03857900 |
| H | -0.00080900 | 5.56904900  | -3.17867400 |
| O | -6.74500500 | -1.80918700 | -1.12702500 |
| O | 6.74527800  | -1.80870400 | -1.12709600 |
| C | -7.39154900 | -3.05423500 | -1.44897500 |
| H | -7.41179700 | -3.70425000 | -0.57100900 |
| H | -8.40521700 | -2.78661600 | -1.73578000 |
| H | -6.88188400 | -3.53664200 | -2.28642500 |
| C | 7.39190400  | -3.05370800 | -1.44905100 |

|   |            |             |             |
|---|------------|-------------|-------------|
| H | 8.40555400 | -2.78602100 | -1.73585600 |
| H | 7.41219600 | -3.70372400 | -0.57108700 |
| H | 6.88227100 | -3.53614700 | -2.28650300 |

- Triplet dication species at DFT M06/6-311+G(d,p) level

C1

2 3

|   |             |             |             |
|---|-------------|-------------|-------------|
| C | 1.21703800  | 1.36489200  | 0.17203600  |
| C | -0.00000800 | -0.87357900 | 0.37211000  |
| C | -1.21699500 | 1.36492100  | 0.17202700  |
| H | 1.36557800  | 1.67668400  | -0.89269600 |
| H | 2.06069500  | 1.79998200  | 0.72298200  |
| H | -1.36551700 | 1.67671800  | -0.89270500 |
| H | -2.06064300 | 1.80003200  | 0.72296800  |
| O | -0.00002800 | -2.06431600 | 0.60171400  |
| N | 0.00002700  | 1.92720200  | 0.67939900  |
| C | 0.00004500  | 3.37602000  | 0.78171600  |
| H | 0.88345400  | 3.70436300  | 1.33329900  |
| H | 0.00005400  | 3.86236700  | -0.20697500 |
| H | -0.88335900 | 3.70438500  | 1.33329400  |
| C | -1.27464200 | -0.11670700 | 0.20728300  |
| C | 1.27464800  | -0.11673600 | 0.20729400  |
| C | -2.41485400 | -0.90150400 | 0.12345500  |
| H | -2.20871700 | -1.95819500 | 0.30176600  |
| C | 2.41484800  | -0.90154700 | 0.12345700  |
| H | 2.20870600  | -1.95824100 | 0.30174500  |
| C | -3.76977400 | -0.58433000 | -0.11063700 |
| C | -4.71167400 | -1.63727200 | 0.12272900  |
| C | -4.25876500 | 0.67382300  | -0.56713600 |

|   |             |             |             |
|---|-------------|-------------|-------------|
| C | -6.05689800 | -1.42846600 | -0.03425900 |
| H | -4.34051500 | -2.60456300 | 0.44896500  |
| C | -5.60138800 | 0.86942300  | -0.73665800 |
| H | -3.57424200 | 1.47345400  | -0.82066200 |
| C | -6.50741300 | -0.17492500 | -0.46117700 |
| H | -6.76649700 | -2.22405300 | 0.16189400  |
| H | -5.97735800 | 1.82123100  | -1.09503800 |
| H | -7.57165400 | -0.00469500 | -0.59701100 |
| C | 3.76976300  | -0.58436300 | -0.11063600 |
| C | 4.71167700  | -1.63730200 | 0.12268900  |
| C | 4.25873300  | 0.67381300  | -0.56709300 |
| C | 6.05689600  | -1.42847400 | -0.03430500 |
| H | 4.34053200  | -2.60460900 | 0.44889500  |
| C | 5.60135200  | 0.86943500  | -0.73662000 |
| H | 3.57419400  | 1.47344600  | -0.82057500 |
| C | 6.50739100  | -0.17491200 | -0.46118600 |
| H | 6.76650700  | -2.22405900 | 0.16181400  |
| H | 5.97730600  | 1.82126100  | -1.09496700 |
| H | 7.57162900  | -0.00466400 | -0.59702300 |

C2

2 3

|   |             |             |             |
|---|-------------|-------------|-------------|
| C | 1.29222700  | 0.38223600  | 1.20089300  |
| C | -0.95098400 | 0.57090800  | 0.00000000  |
| C | 1.29222700  | 0.38223600  | -1.20089300 |
| H | 1.64282700  | -0.67717000 | 1.27124500  |
| H | 1.72352500  | 0.90422500  | 2.06368700  |
| H | 1.64282700  | -0.67717000 | -1.27124500 |
| H | 1.72352500  | 0.90422500  | -2.06368700 |



|   |             |             |             |
|---|-------------|-------------|-------------|
| O | -2.14246100 | 0.79227300  | 0.00000000  |
| N | 1.77448900  | 1.01824100  | 0.00000000  |
| C | 3.22234600  | 1.15375000  | 0.00000000  |
| H | 3.53957700  | 1.71444800  | 0.88212100  |
| H | 3.73411100  | 0.17558400  | 0.00000000  |
| H | 3.53957700  | 1.71444800  | -0.88212100 |
| C | -0.19411100 | 0.40089300  | -1.27967000 |
| C | -0.19411100 | 0.40089300  | 1.27967000  |
| C | -0.97661100 | 0.30560300  | -2.40634200 |
| H | -2.03836800 | 0.45825400  | -2.20961700 |
| C | -0.97661100 | 0.30560300  | 2.40634200  |
| H | -2.03836800 | 0.45825400  | 2.20961700  |
| C | -0.64072400 | 0.08568800  | -3.76677800 |
| C | -1.67717100 | 0.30915500  | -4.72346400 |
| C | 0.62718500  | -0.35881600 | -4.23919500 |
| C | -1.45760200 | 0.15556000  | -6.06148200 |
| H | -2.65396500 | 0.62603100  | -4.37021500 |
| C | 0.85378700  | -0.52991900 | -5.57420500 |
| H | 1.41862100  | -0.60160300 | -3.54141300 |
| C | -0.18396900 | -0.26169800 | -6.49889300 |
| H | -2.24253400 | 0.34367000  | -6.78560900 |
| H | 1.81437700  | -0.87778700 | -5.93857700 |
| C | -0.64072400 | 0.08568800  | 3.76677800  |
| C | -1.67717100 | 0.30915500  | 4.72346400  |
| C | 0.62718500  | -0.35881600 | 4.23919500  |
| C | -1.45760200 | 0.15556000  | 6.06148200  |
| H | -2.65396500 | 0.62603100  | 4.37021500  |
| C | 0.85378700  | -0.52991900 | 5.57420500  |
| H | 1.41862100  | -0.60160300 | 3.54141300  |

|    |             |             |             |
|----|-------------|-------------|-------------|
| C  | -0.18396900 | -0.26169800 | 6.49889300  |
| H  | -2.24253400 | 0.34367000  | 6.78560900  |
| H  | 1.81437700  | -0.87778700 | 5.93857700  |
| Br | 0.13188200  | -0.48048500 | -8.29631300 |
| Br | 0.13188200  | -0.48048500 | 8.29631300  |

C3

2 3

|   |             |             |             |
|---|-------------|-------------|-------------|
| C | 1.33333300  | 0.29452800  | 1.20337900  |
| C | -0.90496400 | 0.51288400  | 0.00000000  |
| C | 1.33333300  | 0.29452800  | -1.20337900 |
| H | 1.66135900  | -0.77176700 | 1.28708000  |
| H | 1.77176400  | 0.81419600  | 2.06418700  |
| H | 1.66135900  | -0.77176700 | -1.28708000 |
| H | 1.77176400  | 0.81419600  | -2.06418700 |
| O | -2.09388300 | 0.75200500  | 0.00000000  |
| N | 1.84001800  | 0.90209800  | 0.00000000  |
| C | 3.29080200  | 1.00478600  | 0.00000000  |
| H | 3.61963700  | 1.55873800  | 0.88202100  |
| H | 3.78107100  | 0.01624900  | 0.00000000  |
| H | 3.61963700  | 1.55873800  | -0.88202100 |
| C | -0.15134300 | 0.33352400  | -1.27818400 |
| C | -0.15134300 | 0.33352400  | 1.27818400  |
| C | -0.93757400 | 0.24697000  | -2.40928400 |
| H | -1.99548500 | 0.42315300  | -2.21050800 |
| C | -0.93757400 | 0.24697000  | 2.40928400  |
| H | -1.99548500 | 0.42315300  | 2.21050800  |
| C | -0.61006400 | 0.00851300  | -3.76378200 |
| C | -1.64912800 | 0.23262400  | -4.72125500 |

|    |             |             |             |
|----|-------------|-------------|-------------|
| C  | 0.65271000  | -0.45505800 | -4.23736600 |
| C  | -1.43577600 | 0.06327300  | -6.05743700 |
| H  | -2.62122500 | 0.56363400  | -4.36789300 |
| C  | 0.87167100  | -0.64244000 | -5.56973200 |
| H  | 1.44473500  | -0.69934800 | -3.54088300 |
| C  | -0.16798600 | -0.37200300 | -6.49272900 |
| H  | -2.21667700 | 0.25046700  | -6.78605500 |
| H  | 1.82405500  | -1.00532500 | -5.94061000 |
| C  | -0.61006400 | 0.00851300  | 3.76378200  |
| C  | -1.64912800 | 0.23262400  | 4.72125500  |
| C  | 0.65271000  | -0.45505800 | 4.23736600  |
| C  | -1.43577600 | 0.06327300  | 6.05743700  |
| H  | -2.62122500 | 0.56363400  | 4.36789300  |
| C  | 0.87167100  | -0.64244000 | 5.56973200  |
| H  | 1.44473500  | -0.69934800 | 3.54088300  |
| C  | -0.16798600 | -0.37200300 | 6.49272900  |
| H  | -2.21667700 | 0.25046700  | 6.78605500  |
| H  | 1.82405500  | -1.00532500 | 5.94061000  |
| Cl | 0.11554100  | -0.59528500 | -8.13935200 |
| Cl | 0.11554100  | -0.59528500 | 8.13935200  |

C4

2 3

|   |             |             |             |
|---|-------------|-------------|-------------|
| C | -1.23475200 | 1.31779200  | -0.29707300 |
| C | 0.00000100  | -0.92963600 | -0.41329000 |
| C | 1.23475000  | 1.31779300  | -0.29706100 |
| H | -1.47854100 | 1.66234600  | 0.73793000  |
| H | -2.03732600 | 1.72795600  | -0.92603400 |
| H | 1.47852900  | 1.66234900  | 0.73794400  |

|   |             |             |             |
|---|-------------|-------------|-------------|
| H | 2.03732900  | 1.72796000  | -0.92601100 |
| O | 0.00000000  | -2.12973400 | -0.57539900 |
| N | 0.00000000  | 1.91455300  | -0.69932800 |
| C | -0.00000100 | 3.35427800  | -0.87068300 |
| H | -0.88598700 | 3.65942100  | -1.43127100 |
| H | -0.00001500 | 3.87729000  | 0.09807700  |
| H | 0.88599700  | 3.65942500  | -1.43124900 |
| C | 1.27353500  | -0.16362300 | -0.29510300 |
| C | -1.27353500 | -0.16362400 | -0.29510900 |
| C | 2.41649000  | -0.94124400 | -0.21621300 |
| H | 2.20064300  | -2.00312300 | -0.34631100 |
| C | -2.41648900 | -0.94124500 | -0.21622100 |
| H | -2.20064100 | -2.00312500 | -0.34630700 |
| C | 3.78446800  | -0.62589700 | -0.03947100 |
| C | 4.70240800  | -1.69710400 | -0.26080100 |
| C | 4.30506200  | 0.64070200  | 0.34432400  |
| C | 6.05947100  | -1.50588000 | -0.15998900 |
| H | 4.31107700  | -2.67327100 | -0.53228100 |
| C | 5.65443700  | 0.82331900  | 0.46054800  |
| H | 3.64651400  | 1.46497000  | 0.58702800  |
| C | 6.53503700  | -0.24668200 | 0.19809000  |
| H | 6.75241000  | -2.31874000 | -0.34507100 |
| H | 6.06281900  | 1.78128000  | 0.76763800  |
| C | -3.78446700 | -0.62589700 | -0.03948300 |
| C | -4.70240700 | -1.69711100 | -0.26078200 |
| C | -4.30506200 | 0.64071400  | 0.34427200  |
| C | -6.05947000 | -1.50588800 | -0.15996500 |
| H | -4.31107600 | -2.67328400 | -0.53223900 |
| C | -5.65443800 | 0.82333200  | 0.46049500  |

|   |             |             |             |
|---|-------------|-------------|-------------|
| H | -3.64651800 | 1.46499600  | 0.58694000  |
| C | -6.53503800 | -0.24668100 | 0.19807900  |
| H | -6.75240800 | -2.31875400 | -0.34502100 |
| H | -6.06281800 | 1.78130400  | 0.76755100  |
| C | -8.02129900 | 0.02796400  | 0.32196800  |
| C | 8.02129900  | 0.02796500  | 0.32196400  |
| F | -8.73857900 | -1.06539700 | 0.15374200  |
| F | -8.36884600 | 0.92222500  | -0.59688600 |
| F | -8.27648500 | 0.53522000  | 1.52128700  |
| F | 8.73857600  | -1.06540600 | 0.15378500  |
| F | 8.36884000  | 0.92218100  | -0.59693800 |
| F | 8.27649600  | 0.53527900  | 1.52125500  |

C5

2 3

|   |             |             |             |
|---|-------------|-------------|-------------|
| C | 1.19699300  | 1.40858700  | 0.21592200  |
| C | -0.00000200 | -0.82577800 | 0.49737500  |
| C | -1.19698000 | 1.40859700  | 0.21592700  |
| H | 1.25042800  | 1.72632300  | -0.85391300 |
| H | 2.06271100  | 1.85978900  | 0.71574200  |
| H | -1.25041800 | 1.72633600  | -0.85390700 |
| H | -2.06269000 | 1.85980500  | 0.71575300  |
| O | -0.00000700 | -2.01175200 | 0.75615400  |
| N | 0.00001000  | 1.89735000  | 0.85807000  |
| C | 0.00001600  | 3.34703800  | 0.96285500  |
| H | 0.88244600  | 3.67716300  | 1.51586200  |
| H | 0.00001600  | 3.83790000  | -0.02668700 |
| H | -0.88240800 | 3.67717000  | 1.51586600  |
| C | -1.27773900 | -0.07760900 | 0.29800900  |

|   |             |             |             |
|---|-------------|-------------|-------------|
| C | 1.27774100  | -0.07761900 | 0.29800700  |
| C | -2.40953600 | -0.85941900 | 0.24089800  |
| H | -2.21957700 | -1.91334800 | 0.44631400  |
| C | 2.40953400  | -0.85943300 | 0.24089400  |
| H | 2.21957200  | -1.91336300 | 0.44630500  |
| C | -3.76003700 | -0.52228900 | -0.00510600 |
| C | -4.73498900 | -1.54178200 | 0.24515900  |
| C | -4.22342900 | 0.73266100  | -0.50352300 |
| C | -6.06781800 | -1.32927500 | 0.07280600  |
| H | -4.38889200 | -2.50785100 | 0.60107500  |
| C | -5.54794900 | 0.95811900  | -0.69398100 |
| H | -3.51783800 | 1.50932300  | -0.76903500 |
| C | -6.50196500 | -0.06273200 | -0.39836700 |
| H | -6.78259000 | -2.11505300 | 0.28686900  |
| H | -5.92585500 | 1.89811800  | -1.08182200 |
| C | 3.76003400  | -0.52230200 | -0.00510800 |
| C | 4.73498800  | -1.54179500 | 0.24514500  |
| C | 4.22342200  | 0.73265600  | -0.50350800 |
| C | 6.06781700  | -1.32928200 | 0.07279300  |
| H | 4.38889400  | -2.50787000 | 0.60104900  |
| C | 5.54794100  | 0.95812000  | -0.69396400 |
| H | 3.51782700  | 1.50932100  | -0.76900600 |
| C | 6.50196000  | -0.06273200 | -0.39836500 |
| H | 6.78259100  | -2.11506200 | 0.28684500  |
| H | 5.92584500  | 1.89812500  | -1.08179200 |
| C | -8.82044900 | -0.65957400 | -0.37414100 |
| H | -8.84989700 | -0.93790900 | 0.68179700  |
| H | -9.72311400 | -0.11751600 | -0.64351300 |
| H | -8.70437500 | -1.53850200 | -1.01222000 |

|   |             |             |             |
|---|-------------|-------------|-------------|
| C | 8.82044600  | -0.65956900 | -0.37414900 |
| H | 8.70437400  | -1.53848800 | -1.01224100 |
| H | 9.72310900  | -0.11750500 | -0.64351200 |
| H | 8.84989400  | -0.93791900 | 0.68178500  |
| O | -7.73807300 | 0.26287600  | -0.60855300 |
| O | 7.73806700  | 0.26288200  | -0.60854700 |

C6

2 3

|   |             |             |             |
|---|-------------|-------------|-------------|
| C | 1.22467300  | 0.19179500  | 0.65222500  |
| C | 0.04216800  | -2.00085300 | 0.09353300  |
| C | -1.19636400 | 0.15492200  | 0.67408300  |
| H | 1.32573800  | 0.84741300  | -0.25532700 |
| H | 2.08050800  | 0.44827100  | 1.28974300  |
| H | -1.33789800 | 0.81600300  | -0.22380500 |
| H | -2.04870200 | 0.37601500  | 1.32972000  |
| O | 0.05745200  | -3.19657000 | -0.10600000 |
| N | 0.01460100  | 0.53031100  | 1.34533500  |
| C | -1.23929900 | -1.24854800 | 0.21202100  |
| C | 1.30448500  | -1.21428600 | 0.20172800  |
| C | -2.37750300 | -1.97259400 | -0.10663600 |
| H | -2.16933500 | -3.02773800 | -0.29055500 |
| C | 2.45902200  | -1.91240300 | -0.11509100 |
| H | 2.27487200  | -2.97296000 | -0.29351100 |
| C | -3.73550300 | -1.59881000 | -0.19980900 |
| C | -4.67976700 | -2.66826500 | -0.28897000 |
| C | -4.22247000 | -0.26087100 | -0.22798900 |
| C | -6.02729700 | -2.41802800 | -0.33860600 |
| H | -4.31070100 | -3.68978900 | -0.29450800 |

|   |             |             |             |
|---|-------------|-------------|-------------|
| C | -5.56763900 | -0.01995500 | -0.29719200 |
| H | -3.53423100 | 0.57625000  | -0.23749900 |
| C | -6.47638200 | -1.09466300 | -0.33953300 |
| H | -6.73873800 | -3.23454100 | -0.38506500 |
| H | -5.94249100 | 0.99685800  | -0.33193400 |
| C | 3.80869500  | -1.50989200 | -0.20732300 |
| C | 4.77472300  | -2.56073900 | -0.28727000 |
| C | 4.26876800  | -0.16255300 | -0.23837800 |
| C | 6.11731200  | -2.28425200 | -0.32912900 |
| H | 4.42596700  | -3.58935100 | -0.29131500 |
| C | 5.60940500  | 0.10463800  | -0.29891000 |
| H | 3.56357400  | 0.66029900  | -0.25589800 |
| C | 6.53978400  | -0.95221200 | -0.33081400 |
| H | 6.84512900  | -3.08657900 | -0.36829600 |
| H | 5.96436200  | 1.12852700  | -0.33424500 |
| C | -0.00414400 | 1.91012300  | 1.84818700  |
| H | 0.89006300  | 2.04126400  | 2.46735000  |
| H | -0.86922300 | 1.99922800  | 2.51483400  |
| C | -0.05997900 | 2.96182000  | 0.76820000  |
| C | -1.28966800 | 3.43578300  | 0.30299300  |
| C | 1.11521200  | 3.46858000  | 0.20707000  |
| C | -1.34416700 | 4.36785700  | -0.72284500 |
| H | -2.20999000 | 3.10481300  | 0.78194800  |
| C | 1.06156400  | 4.40005600  | -0.81954200 |
| H | 2.08010600  | 3.16491500  | 0.61066500  |
| C | -0.16838100 | 4.84708100  | -1.28806700 |
| H | -2.30242700 | 4.74222400  | -1.06753200 |
| H | 1.97882800  | 4.79920600  | -1.23971300 |
| H | -0.21006800 | 5.59129500  | -2.07624800 |



|     |             |             |             |
|-----|-------------|-------------|-------------|
| H   | 7.60097700  | -0.72488300 | -0.37269500 |
| H   | -7.54162200 | -0.88874600 | -0.38907500 |
| C7  |             |             |             |
| 2 3 |             |             |             |
| C   | 1.21466100  | 0.39872300  | 0.69397200  |
| C   | 0.02429600  | -1.82839600 | 0.32297900  |
| C   | -1.18790000 | 0.38232900  | 0.71317900  |
| H   | 1.27899000  | 0.99494400  | -0.25106500 |
| H   | 2.08023000  | 0.69423400  | 1.29979800  |
| H   | -1.27677300 | 0.98459700  | -0.22599000 |
| H   | -2.04826200 | 0.66224300  | 1.33387800  |
| O   | 0.03034600  | -3.03666000 | 0.22884600  |
| N   | 0.01676200  | 0.71387200  | 1.43311800  |
| C   | -1.25598500 | -1.05819300 | 0.36307300  |
| C   | 1.29718900  | -1.04431200 | 0.35361700  |
| C   | -2.38520100 | -1.79412500 | 0.08619800  |
| H   | -2.18888200 | -2.86066000 | -0.02797000 |
| C   | 2.43199600  | -1.77253900 | 0.08017700  |
| H   | 2.24358200  | -2.84128600 | -0.02650700 |
| C   | -3.74520700 | -1.41450200 | -0.03747800 |
| C   | -4.70037600 | -2.47411300 | -0.06604600 |
| C   | -4.22038000 | -0.07764300 | -0.15991200 |
| C   | -6.04021900 | -2.22557100 | -0.15226300 |
| H   | -4.34554400 | -3.49822500 | 0.00177300  |
| C   | -5.55748800 | 0.18013500  | -0.26495100 |
| H   | -3.52406000 | 0.75150700  | -0.21067300 |
| C   | -6.47959900 | -0.89182100 | -0.24895200 |
| H   | -6.76284500 | -3.03384900 | -0.15313200 |

|    |             |             |             |
|----|-------------|-------------|-------------|
| H  | -5.92468200 | 1.19514000  | -0.37155200 |
| C  | 3.78970200  | -1.38502100 | -0.04458300 |
| C  | 4.75125100  | -2.43919000 | -0.06130100 |
| C  | 4.25711400  | -0.04638200 | -0.17678500 |
| C  | 6.08983600  | -2.18337500 | -0.14426000 |
| H  | 4.40218900  | -3.46478900 | 0.01353500  |
| C  | 5.59300000  | 0.21873000  | -0.27840300 |
| H  | 3.55531800  | 0.77743600  | -0.23752700 |
| C  | 6.52157500  | -0.84764600 | -0.24953000 |
| H  | 6.81732300  | -2.98724900 | -0.13568300 |
| H  | 5.95459600  | 1.23503900  | -0.39177800 |
| C  | 0.00685900  | 2.09563000  | 1.94151500  |
| H  | 0.90397500  | 2.21711700  | 2.55862000  |
| H  | -0.85321000 | 2.18202700  | 2.61517000  |
| C  | -0.05102800 | 3.15726900  | 0.87572200  |
| C  | -1.27991600 | 3.64607700  | 0.42315800  |
| C  | 1.12088000  | 3.66627900  | 0.30888500  |
| C  | -1.33804300 | 4.59869200  | -0.58200100 |
| H  | -2.19862600 | 3.30497000  | 0.89830300  |
| C  | 1.06651500  | 4.61864600  | -0.69699500 |
| H  | 2.08667700  | 3.34263200  | 0.69414800  |
| C  | -0.16398300 | 5.08236000  | -1.14804900 |
| H  | -2.29671500 | 4.98496000  | -0.91242000 |
| H  | 1.98294000  | 5.01994300  | -1.11718400 |
| H  | -0.20742000 | 5.83935400  | -1.92393000 |
| Br | -8.28170700 | -0.53529300 | -0.37972400 |
| Br | 8.32181600  | -0.48116800 | -0.37451000 |

C8

2 3

|   |             |             |             |
|---|-------------|-------------|-------------|
| C | 1.20342100  | 0.29318200  | 0.67041400  |
| C | 0.00009200  | -1.91117100 | 0.22046300  |
| C | -1.20333000 | 0.29312000  | 0.67045900  |
| H | 1.29112200  | 0.91427000  | -0.25849300 |
| H | 2.06481100  | 0.56367600  | 1.29400600  |
| H | -1.29110200 | 0.91422300  | -0.25843100 |
| H | -2.06471300 | 0.56355500  | 1.29408800  |
| O | 0.00011700  | -3.11635700 | 0.08731100  |
| N | 0.00005000  | 0.62164700  | 1.39029900  |
| C | -1.27489000 | -1.13637700 | 0.28397100  |
| C | 1.27504300  | -1.13632100 | 0.28395700  |
| C | -2.41244800 | -1.86124400 | -0.00887200 |
| H | -2.21958000 | -2.92599800 | -0.14509300 |
| C | 2.41263000  | -1.86115100 | -0.00886000 |
| H | 2.21980200  | -2.92591400 | -0.14506900 |
| C | -3.76716300 | -1.47387600 | -0.12353400 |
| C | -4.72916600 | -2.52893200 | -0.17688100 |
| C | -4.23742200 | -0.13116700 | -0.21038800 |
| C | -6.06786100 | -2.27185300 | -0.24710400 |
| H | -4.37907500 | -3.55622500 | -0.13899400 |
| C | -5.57255800 | 0.13496900  | -0.29893200 |
| H | -3.53791900 | 0.69587100  | -0.24630400 |
| C | -6.49879200 | -0.93382300 | -0.30271800 |
| H | -6.79950200 | -3.07188400 | -0.26611900 |
| H | -5.94254800 | 1.15123500  | -0.37764200 |
| C | 3.76733600  | -1.47374000 | -0.12349100 |
| C | 4.72937300  | -2.52876700 | -0.17680000 |

|    |             |             |             |
|----|-------------|-------------|-------------|
| C  | 4.23755500  | -0.13101600 | -0.21033400 |
| C  | 6.06806300  | -2.27164600 | -0.24697600 |
| H  | 4.37931300  | -3.55607000 | -0.13891900 |
| C  | 5.57268500  | 0.13516100  | -0.29883100 |
| H  | 3.53802500  | 0.69599900  | -0.24627600 |
| C  | 6.49895300  | -0.93360200 | -0.30258000 |
| H  | 6.79973000  | -3.07165400 | -0.26596100 |
| H  | 5.94264600  | 1.15143800  | -0.37752900 |
| C  | 0.00001500  | 2.00436800  | 1.89417500  |
| H  | 0.87929300  | 2.11058500  | 2.53935100  |
| H  | -0.87915100 | 2.11047600  | 2.53952200  |
| C  | -0.00016400 | 3.06421900  | 0.82374700  |
| C  | -1.20247300 | 3.56335400  | 0.31404200  |
| C  | 1.20196800  | 3.56343000  | 0.31369900  |
| C  | -1.20422700 | 4.51385300  | -0.69505200 |
| H  | -2.14585000 | 3.23435800  | 0.74737400  |
| C  | 1.20336900  | 4.51392800  | -0.69539800 |
| H  | 2.14549100  | 3.23449600  | 0.74675900  |
| C  | -0.00051700 | 4.98701200  | -1.20492800 |
| H  | -2.14290300 | 4.90724600  | -1.07115800 |
| H  | 2.14191300  | 4.90737900  | -1.07177400 |
| H  | -0.00065300 | 5.74392400  | -1.98206300 |
| Cl | -8.15041800 | -0.59140400 | -0.39602000 |
| Cl | 8.15057100  | -0.59113200 | -0.39582400 |

C9

2 3

|   |             |             |            |
|---|-------------|-------------|------------|
| C | 1.20241800  | 0.30720300  | 0.77708700 |
| C | -0.02225400 | -1.85409100 | 0.17110100 |

|   |             |             |             |
|---|-------------|-------------|-------------|
| C | -1.22889600 | 0.32393800  | 0.74987800  |
| H | 1.36175500  | 0.98136100  | -0.11014300 |
| H | 2.04312900  | 0.52553900  | 1.44932000  |
| H | -1.35180900 | 0.98537600  | -0.15210500 |
| H | -2.08087100 | 0.56793800  | 1.39799900  |
| O | -0.02725500 | -3.04556200 | -0.04522500 |
| N | -0.01765900 | 0.69815900  | 1.41654100  |
| C | -1.29122400 | -1.07915800 | 0.29088300  |
| C | 1.25189500  | -1.09092700 | 0.30266500  |
| C | -2.44047200 | -1.78407600 | -0.02505500 |
| H | -2.24609200 | -2.84098300 | -0.21493700 |
| C | 2.39677600  | -1.80195600 | -0.01510700 |
| H | 2.19572300  | -2.85574900 | -0.21480700 |
| C | -3.79724700 | -1.39403300 | -0.10611000 |
| C | -4.75047800 | -2.45232200 | -0.18397800 |
| C | -4.27119200 | -0.05341300 | -0.12846400 |
| C | -6.10019600 | -2.19319800 | -0.21704800 |
| H | -4.39415100 | -3.47823500 | -0.19479200 |
| C | -5.61327700 | 0.20041300  | -0.18133500 |
| H | -3.57828000 | 0.77945300  | -0.14714600 |
| C | -6.53061700 | -0.86909700 | -0.21216800 |
| H | -6.82342900 | -2.99995400 | -0.25627500 |
| H | -5.98636400 | 1.21940400  | -0.21237600 |
| C | 3.75635000  | -1.41990600 | -0.09302900 |
| C | 4.70289900  | -2.48255600 | -0.18508400 |
| C | 4.23832800  | -0.08217100 | -0.10313100 |
| C | 6.05404300  | -2.23086500 | -0.22274300 |
| H | 4.34075400  | -3.50631200 | -0.20424700 |
| C | 5.58166600  | 0.16446900  | -0.16110600 |

|   |             |             |             |
|---|-------------|-------------|-------------|
| H | 3.55083100  | 0.75525000  | -0.10885700 |
| C | 6.49247200  | -0.90953300 | -0.20819400 |
| H | 6.77198100  | -3.04166200 | -0.27344700 |
| H | 5.96004900  | 1.18172600  | -0.18399300 |
| C | -0.01118800 | 2.07923700  | 1.90893800  |
| H | 0.85070200  | 2.18254600  | 2.57764900  |
| H | -0.91034100 | 2.21229900  | 2.52025600  |
| C | 0.04356300  | 3.11869400  | 0.81437600  |
| C | -1.13265700 | 3.61645200  | 0.24922900  |
| C | 1.27454600  | 3.58485700  | 0.34357700  |
| C | -1.07840500 | 4.53063000  | -0.79364200 |
| H | -2.09748800 | 3.32126800  | 0.65917700  |
| C | 1.32824000  | 4.49920700  | -0.69894500 |
| H | 2.19477400  | 3.26590100  | 0.83075800  |
| C | 0.15197200  | 4.96939100  | -1.27019200 |
| H | -1.99571600 | 4.92273000  | -1.22021900 |
| H | 2.28630400  | 4.86812500  | -1.04980600 |
| H | 0.19291400  | 5.70181100  | -2.06936200 |
| C | -8.00558400 | -0.52254600 | -0.25008000 |
| C | 7.96893200  | -0.57078400 | -0.25480300 |
| F | 8.71894000  | -1.65137600 | -0.35232600 |
| F | 8.29907100  | 0.08686600  | 0.85145600  |
| F | 8.20649100  | 0.21706600  | -1.29742800 |
| F | -8.76153000 | -1.59950100 | -0.34089600 |
| F | -8.32434300 | 0.13816900  | 0.85768300  |
| F | -8.24587500 | 0.26504200  | -1.29201800 |

C10

|   |             |             |             |
|---|-------------|-------------|-------------|
| C | 1.19909700  | 0.38949300  | 0.58599000  |
| C | 0.00009100  | -1.83501400 | 0.23639600  |
| C | -1.19901200 | 0.38942900  | 0.58604600  |
| H | 1.26955500  | 0.97948000  | -0.35984100 |
| H | 2.06165500  | 0.68393500  | 1.19654000  |
| H | -1.26954600 | 0.97942500  | -0.35977300 |
| H | -2.06156000 | 0.68381800  | 1.19663700  |
| O | 0.00011900  | -3.04580600 | 0.14491000  |
| N | 0.00005100  | 0.69878400  | 1.32811000  |
| C | -1.27569100 | -1.06028800 | 0.26470500  |
| C | 1.27583900  | -1.06022700 | 0.26466900  |
| C | -2.41263100 | -1.79497300 | 0.00809400  |
| H | -2.22615500 | -2.86521200 | -0.08396400 |
| C | 2.41280500  | -1.79487200 | 0.00806300  |
| H | 2.22636700  | -2.86512000 | -0.08397500 |
| C | -3.76382200 | -1.40294300 | -0.11679000 |
| C | -4.73599300 | -2.45373300 | -0.13381100 |
| C | -4.23473200 | -0.06079800 | -0.24747300 |
| C | -6.07245700 | -2.20664600 | -0.20717200 |
| H | -4.38532200 | -3.47941600 | -0.06519900 |
| C | -5.56348700 | 0.20181900  | -0.33755400 |
| H | -3.53328700 | 0.76267700  | -0.31247800 |
| C | -6.51354200 | -0.86265000 | -0.30220700 |
| H | -6.78291800 | -3.02435400 | -0.19756200 |
| H | -5.94827600 | 1.20995100  | -0.44846900 |
| C | 3.76398400  | -1.40280300 | -0.11682400 |
| C | 4.73618600  | -2.45356600 | -0.13381400 |
| C | 4.23485900  | -0.06064700 | -0.24752800 |
| C | 6.07264300  | -2.20644400 | -0.20715800 |

|   |             |             |             |
|---|-------------|-------------|-------------|
| H | 4.38554100  | -3.47925700 | -0.06518800 |
| C | 5.56360900  | 0.20200500  | -0.33759200 |
| H | 3.53339200  | 0.76280600  | -0.31256000 |
| C | 6.51369200  | -0.86243700 | -0.30220900 |
| H | 6.78312600  | -3.02413200 | -0.19752300 |
| H | 5.94837100  | 1.21014600  | -0.44852000 |
| C | 0.00002000  | 2.07145600  | 1.86436800  |
| H | 0.87926900  | 2.16095700  | 2.51222900  |
| H | -0.87911300 | 2.16084900  | 2.51240300  |
| C | -0.00015700 | 3.15170400  | 0.81736700  |
| C | -1.20000300 | 3.65648500  | 0.31300300  |
| C | 1.19951500  | 3.65655300  | 0.31265700  |
| C | -1.20253900 | 4.62563800  | -0.67928400 |
| H | -2.14401900 | 3.31463000  | 0.73550200  |
| C | 1.20170600  | 4.62570600  | -0.67963300 |
| H | 2.14367300  | 3.31475000  | 0.73488000  |
| C | -0.00050300 | 5.10702700  | -1.18197600 |
| H | -2.14203500 | 5.02380100  | -1.04881200 |
| H | 2.14107300  | 5.02392000  | -1.04943400 |
| H | -0.00063600 | 5.87407800  | -1.94918900 |
| O | -7.75533000 | -0.49492200 | -0.37726000 |
| O | 7.75547200  | -0.49467600 | -0.37724400 |
| C | -8.83324500 | -1.44988200 | -0.36230300 |
| H | -8.80927800 | -2.02724800 | 0.56495600  |
| H | -9.74325200 | -0.85758100 | -0.40983200 |
| H | -8.76467800 | -2.10294300 | -1.23544200 |
| C | 8.83341200  | -1.44960700 | -0.36224700 |
| H | 9.74340400  | -0.85728200 | -0.40976900 |



|   |            |             |             |
|---|------------|-------------|-------------|
| H | 8.80944200 | -2.02695500 | 0.56502200  |
| H | 8.76488100 | -2.10268600 | -1.23537500 |
